# Supplementary material for: YouTube as a Source of Patient Information for Meningiomas: A Content Quality and Audience Engagement Analysis
Source: MDPI journal article supplement (doi:10.3390/healthcare10030506), 2022-03-10
Supplement: s1 [file s1]

Supplementary Table S1.

|         |                          | Indications for surgery |         | Treatment options |         | Localization and clinical manifestations |         | Treatment risks |         | Follow up |         | Adjuvant treatment |         | Results of treatment/prognosis |         | Diagrams |         | Doctor speaker |         |
|---------|--------------------------|-------------------------|---------|-------------------|---------|------------------------------------------|---------|-----------------|---------|-----------|---------|--------------------|---------|--------------------------------|---------|----------|---------|----------------|---------|
|         |                          | With                    | Without | With              | Without | With                                     | Without | With            | Without | With      | Without | With               | Without | With                           | Without | With     | Without | With           | Without |
| DISCERN | Count                    | 31,00                   | 88,00   | 84,00             | 35,00   | 41,00                                    | 78,00   | 15,00           | 104,00  | 20,00     | 99,00   | 25,00              | 94,00   | 34,00                          | 85,00   | 16,00    | 103,00  | 92,00          | 27,00   |
|         | Mean                     | 43,91                   | 32,63   | 38,30             | 29,02   | 42,66                                    | 31,84   | 46,75           | 33,96   | 46,17     | 33,43   | 47,47              | 32,40   | 43,84                          | 32,26   | 44,73    | 34,15   | 37,34          | 29,54   |
|         | Median                   | 42,80                   | 30,80   | 37,10             | 28,00   | 41,20                                    | 30,80   | 44,80           | 32,20   | 45,90     | 31,60   | 45,80              | 30,80   | 44,90                          | 30,80   | 44,30    | 31,80   | 35,50          | 28,60   |
|         | Standard deviation       | 9,44                    | 7,15    | 9,17              | 5,25    | 9,31                                     | 6,67    | 8,84            | 8,12    | 7,90      | 7,92    | 7,34               | 6,76    | 9,29                           | 6,84    | 8,46     | 8,52    | 9,21           | 6,34    |
|         | -95% confidence interval | 40,45                   | 31,12   | 36,31             | 27,22   | 39,72                                    | 30,34   | 41,85           | 32,38   | 42,47     | 31,85   | 44,44              | 31,02   | 40,59                          | 30,79   | 40,21    | 32,48   | 35,43          | 27,03   |
|         | +95% confidence interval | 47,37                   | 34,14   | 40,28             | 30,83   | 45,60                                    | 33,34   | 51,64           | 35,54   | 49,87     | 35,01   | 50,50              | 33,79   | 47,08                          | 33,74   | 49,24    | 35,81   | 39,24          | 32,05   |
|         | p                        | 0,000                   |         | 0,000             |         | 0,000                                    |         | 0,000           |         | 0,000     |         | 0,000              |         | 0,000                          |         | 0,000    |         | 0,000          |         |
| GQS     | Count                    | 31,00                   | 88,00   | 84,00             | 35,00   | 41,00                                    | 78,00   | 15,00           | 104,00  | 20,00     | 99,00   | 25,00              | 94,00   | 34,00                          | 85,00   | 16,00    | 103,00  | 92,00          | 27,00   |
|         | Mean                     | 2,87                    | 2,29    | 2,59              | 2,09    | 2,85                                     | 2,22    | 3,00            | 2,36    | 2,95      | 2,34    | 3,09               | 2,27    | 2,94                           | 2,24    | 2,78     | 2,39    | 2,54           | 2,09    |
|         | Median                   | 2,80                    | 2,30    | 2,60              | 2,00    | 2,80                                     | 2,20    | 3,20            | 2,40    | 2,90      | 2,40    | 3,20               | 2,20    | 3,00                           | 2,20    | 2,60     | 2,40    | 2,50           | 2,20    |
|         | Standard deviation       | 0,67                    | 0,61    | 0,66              | 0,60    | 0,59                                     | 0,62    | 0,71            | 0,64    | 0,55      | 0,66    | 0,61               | 0,59    | 0,57                           | 0,61    | 0,64     | 0,67    | 0,67           | 0,59    |
|         | -95% confidence interval | 2,62                    | 2,16    | 2,45              | 1,88    | 2,67                                     | 2,08    | 2,61            | 2,24    | 2,69      | 2,21    | 2,84               | 2,15    | 2,74                           | 2,11    | 2,43     | 2,26    | 2,41           | 1,85    |
|         | +95% confidence interval | 3,12                    | 2,42    | 2,73              | 2,29    | 3,04                                     | 2,36    | 3,39            | 2,48    | 3,21      | 2,47    | 3,34               | 2,39    | 3,13                           | 2,37    | 3,12     | 2,52    | 2,68           | 2,32    |
|         | p                        | 0,000                   |         | 0,000             |         | 0,000                                    |         | 0,003           |         | 0,000     |         | 0,000              |         | 0,000                          |         | 0,049    |         | 0,004          |         |
| JAMA    | Count                    | 31,00                   | 88,00   | 84,00             | 35,00   | 41,00                                    | 78,00   | 15,00           | 104,00  | 20,00     | 99,00   | 25,00              | 94,00   | 34,00                          | 85,00   | 16,00    | 103,00  | 92,00          | 27,00   |
|         | Mean                     | 2,12                    | 1,67    | 1,93              | 1,46    | 2,01                                     | 1,67    | 2,17            | 1,73    | 2,28      | 1,69    | 2,18               | 1,68    | 2,10                           | 1,66    | 2,39     | 1,69    | 1,93           | 1,31    |
|         | Median                   | 2,00                    | 1,50    | 1,88              | 1,50    | 2,00                                     | 1,50    | 2,00            | 1,50    | 2,00      | 1,50    | 2,00               | 1,50    | 2,00                           | 1,50    | 2,38     | 1,50    | 1,75           | 1,00    |
|         | Standard deviation       | 0,63                    | 0,69    | 0,74              | 0,47    | 0,68                                     | 0,68    | 0,67            | 0,69    | 0,74      | 0,65    | 0,74               | 0,65    | 0,76                           | 0,64    | 0,54     | 0,68    | 0,68           | 0,54    |
|         | -95% confidence interval | 1,89                    | 1,52    | 1,77              | 1,30    | 1,80                                     | 1,52    | 1,79            | 1,60    | 1,93      | 1,56    | 1,87               | 1,55    | 1,83                           | 1,53    | 2,10     | 1,56    | 1,78           | 1,10    |
|         | +95% confidence interval | 2,35                    | 1,82    | 2,09              | 1,62    | 2,23                                     | 1,82    | 2,54            | 1,87    | 2,62      | 1,82    | 2,49               | 1,82    | 2,36                           | 1,80    | 2,68     | 1,83    | 2,07           | 1,53    |
|         | p                        | 0,000                   |         | 0,001             |         | 0,003                                    |         | 0,012           |         | 0,000     |         | 0,001              |         | 0,000                          |         | 0,000    |         | 0,000          |         |

Supplementary Table S2.

|         |                          | Symptoms |         | Predisposing factors |         | Epidemiology |         | Clean information |         | When to seek medical attention |         |
|---------|--------------------------|----------|---------|----------------------|---------|--------------|---------|-------------------|---------|--------------------------------|---------|
|         |                          | With     | Without | With                 | Without | With         | Without | With              | Without | With                           | Without |
| DISCERN | Count                    | 88,00    | 31,00   | 39,00                | 80,00   | 41,00        | 78,00   | 67,00             | 52,00   | 7,00                           | 112,00  |
|         | Mean                     | 37,22    | 30,87   | 41,95                | 32,46   | 41,12        | 32,65   | 38,14             | 32,26   | 48,26                          | 34,78   |
|         | Median                   | 35,60    | 29,20   | 41,20                | 31,10   | 41,20        | 31,60   | 36,20             | 31,60   | 45,60                          | 33,20   |
|         | Standard deviation       | 9,39     | 6,92    | 10,10                | 6,93    | 11,05        | 6,47    | 10,20             | 6,50    | 9,65                           | 8,63    |
|         | -95% confidence interval | 35,23    | 28,33   | 38,68                | 30,91   | 37,63        | 31,19   | 35,65             | 30,45   | 39,33                          | 33,16   |
|         | +95% confidence interval | 39,21    | 33,41   | 45,23                | 34,00   | 44,61        | 34,11   | 40,62             | 34,07   | 57,18                          | 36,39   |
|         | p                        | 0,001    |         | 0,000                |         | 0,000        |         | 0,002             |         | 0,001                          |         |
| GQS     | Count                    | 88,00    | 31,00   | 39,00                | 80,00   | 41,00        | 78,00   | 67,00             | 52,00   | 7,00                           | 112,00  |
|         | Mean                     | 2,54     | 2,17    | 2,93                 | 2,20    | 2,76         | 2,27    | 2,64              | 2,18    | 3,34                           | 2,38    |
|         | Median                   | 2,60     | 2,20    | 3,00                 | 2,20    | 2,80         | 2,40    | 2,60              | 2,20    | 3,20                           | 2,40    |
|         | Standard deviation       | 0,64     | 0,73    | 0,64                 | 0,56    | 0,77         | 0,56    | 0,69              | 0,57    | 0,41                           | 0,65    |
|         | -95% confidence interval | 2,40     | 1,90    | 2,73                 | 2,08    | 2,51         | 2,15    | 2,47              | 2,03    | 2,96                           | 2,26    |
|         | +95% confidence interval | 2,67     | 2,43    | 3,14                 | 2,32    | 3,00         | 2,40    | 2,81              | 2,34    | 3,72                           | 2,51    |
|         | p                        | 0,013    |         | 0,000                |         | 0,000        |         | 0,000             |         | 0,000                          |         |

Supplementary Table S3.

|         |                          | Genetical predisposition |         | How to perform procedure |         | Animation    |         | Radiological data |         | Misleading info    |         |         |  |
|---------|--------------------------|--------------------------|---------|--------------------------|---------|--------------|---------|-------------------|---------|--------------------|---------|---------|--|
|         |                          | With                     | Without | With                     | Without | With         | Without | With              | Without | With               | Without |         |  |
| JAMA    | Count                    | 15,00                    | 104,00  | 28,00                    | 91,00   | 40,00        | 79,00   | 86,00             | 33,00   | 35,00              | 84,00   |         |  |
|         | Mean                     | 2,08                     | 1,75    | 2,25                     | 1,65    | 2,04         | 1,66    | 1,87              | 1,58    | 1,54               | 1,89    |         |  |
|         | Median                   | 2,00                     | 1,50    | 2,00                     | 1,50    | 2,00         | 1,50    | 1,75              | 1,50    | 1,50               | 1,75    |         |  |
|         | Standard deviation       | 0,69                     | 0,69    | 0,79                     | 0,61    | 0,75         | 0,64    | 0,72              | 0,60    | 0,60               | 0,72    |         |  |
|         | -95% confidence interval | 1,70                     | 1,61    | 1,94                     | 1,52    | 1,80         | 1,52    | 1,71              | 1,36    | 1,34               | 1,73    |         |  |
|         | +95% confidence interval | 2,46                     | 1,88    | 2,56                     | 1,77    | 2,28         | 1,81    | 2,02              | 1,79    | 1,75               | 2,05    |         |  |
| p       |                          | 0,046                    |         | 0,000                    |         | 0,004        |         | 0,031             |         | 0,007              |         |         |  |
|         |                          |                          |         |                          |         |              |         |                   |         |                    |         |         |  |
|         |                          | Histology                |         |                          |         | Embolization |         |                   |         | WHO classification |         |         |  |
|         |                          | With                     |         | Without                  |         | With         |         | Without           |         | With               |         | Without |  |
| DISCERN | Count                    | 19,00                    |         | 100,00                   |         | 11,00        |         | 108,00            |         | 15,00              |         | 104,00  |  |
|         | Mean                     | 32,60                    |         | 36,13                    |         | 42,87        |         | 34,82             |         | 42,51              |         | 34,57   |  |
|         | Median                   | 28,00                    |         | 35,40                    |         | 40,40        |         | 32,80             |         | 42,80              |         | 33,50   |  |
|         | Standard deviation       | 11,52                    |         | 8,67                     |         | 8,63         |         | 8,99              |         | 13,23              |         | 8,10    |  |
|         | -95% confidence interval | 27,05                    |         | 34,41                    |         | 37,07        |         | 33,11             |         | 35,18              |         | 32,99   |  |
|         | +95% confidence interval | 38,15                    |         | 37,85                    |         | 48,67        |         | 36,54             |         | 49,83              |         | 36,14   |  |
| p       |                          | 0,009                    |         |                          |         | 0,004        |         |                   |         | 0,031              |         |         |  |

Supplementary Table S4. Audience engagement

|             |                           | Animations |          |
|-------------|---------------------------|------------|----------|
|             |                           | With       | Without  |
| Views       | Count                     | 40,00      | 79,00    |
|             | Mean                      | 47205,43   | 12567,46 |
|             | Median                    | 10568,00   | 3910,00  |
|             | Standard deviation        | 110909,16  | 21559,60 |
|             | - 95% confidence interval | 11734,95   | 7738,37  |
|             | + 95% confidence interval | 82675,90   | 17396,54 |
|             | P                         | 0,005      |          |
| Likes       | Count                     | 40,00      | 79,00    |
|             | Mean                      | 386,50     | 142,61   |
|             | Median                    | 65,50      | 35,00    |
|             | Standard deviation        | 1000,83    | 369,47   |
|             | - 95% confidence interval | 66,42      | 59,85    |
|             | + 95% confidence interval | 706,58     | 225,36   |
|             | P                         | 0,002      |          |
| Dislikes    | Count                     | 40,00      | 79,00    |
|             | Mean                      | 16,60      | 4,09     |
|             | Median                    | 3,00       | 1,00     |
|             | Standard deviation        | 40,75      | 7,43     |
|             | - 95% confidence interval | 3,57       | 2,42     |
|             | + 95% confidence interval | 29,63      | 5,75     |
|             | P                         | 0,009      |          |
| Comments    | Count                     | 35,00      | 72,00    |
|             | Mean                      | 57,26      | 11,90    |
|             | Median                    | 8,00       | 3,00     |
|             | Standard deviation        | 163,51     | 21,69    |
|             | - 95% confidence interval | 1,09       | 6,81     |
|             | + 95% confidence interval | 113,42     | 17,00    |
|             | P                         | 0,010      |          |
| Subscribers | Count                     | 40,00      | 76,00    |
|             | Mean                      | 64389,00   | 48435,59 |

|            |                                  |          |          |
|------------|----------------------------------|----------|----------|
|            | <b>Median</b>                    | 45200,00 | 19050,00 |
|            | <b>Standard deviation</b>        | 98999,67 | 82195,36 |
|            | <b>- 95% confidence interval</b> | 32727,37 | 29653,15 |
|            | <b>+ 95% confidence interval</b> | 96050,63 | 67218,04 |
|            | <b>P</b>                         | 0,036    |          |
| <b>VPI</b> | <b>Count</b>                     | 40,00    | 79,00    |
|            | <b>Mean</b>                      | 32,85    | 7,98     |
|            | <b>Median</b>                    | 5,65     | 3,16     |
|            | <b>Standard deviation</b>        | 90,48    | 16,87    |
|            | <b>- 95% confidence interval</b> | 3,91     | 4,20     |
|            | <b>+ 95% confidence interval</b> | 61,79    | 11,75    |
|            | <b>P</b>                         | 0,002    |          |

|                   |                                  |                |       |
|-------------------|----------------------------------|----------------|-------|
|                   |                                  | Misinformation |       |
| <b>Like ratio</b> | <b>Count</b>                     | 35,00          | 84,00 |
|                   | <b>Mean</b>                      | 79,06          | 93,88 |
|                   | <b>Median</b>                    | 95,18          | 97,01 |
|                   | <b>Standard deviation</b>        | 36,80          | 15,45 |
|                   | <b>- 95% confidence interval</b> | 66,41          | 90,53 |
|                   | <b>+ 95% confidence interval</b> | 91,70          | 97,23 |
|                   | <b>P</b>                         | 0,036          |       |

**Supplementary Table S5.** Top 5 DISCERN videos.

|   | Mean DISCERN score | VPI score | Mean GQS score | Mean JAMA score | Symptoms | Definition | Risk factors | Pregnancy and meningiomas | WHO classification | Epidemiology | Misinformation | Who was the speaker | Country | Time (s) | Like ratio |
|---|--------------------|-----------|----------------|-----------------|----------|------------|--------------|---------------------------|--------------------|--------------|----------------|---------------------|---------|----------|------------|
| 1 | 62,00              | 29,68     | 3,60           | 2,25            | +        | +          | +            | -                         | +                  | +            | +              | Doctor              | USA     | 3172     | 96,95      |
| 2 | 57,00              | 22,73     | 4,00           | 3,00            | +        | +          | +            | -                         | +                  | +            | +              | Doctor              | USA     | 3651     | 94,07      |
| 3 | 56,60              | 5,28      | 4,00           | 2,50            | +        | +          | +            | +                         | +                  | +            | -              | Doctor              | -       | 2768     | 95,56      |
| 4 | 55,60              | 0,44      | 3,20           | 2,00            | +        | -          | +            | -                         | +                  | +            | -              | Doctor              | -       | 2734     | 80,00      |
| 5 | 54,20              | 5,48      | 3,60           | 2,50            | +        | -          | +            | -                         | -                  | +            | +              | Doctor              | USA     | 3523     | 93,78      |

Supplementary Table S6. TOP 5 VPI videos

|   | VPI score | Mean DISCERN score | Mean GQS score | Mean JAMA score | Symptoms | Definition | Risk factors | Pregnancy and meningiomas | WHO classification | Epidemiology | Misinformation | Speaker | Country | Time (s) | Like ratio |
|---|-----------|--------------------|----------------|-----------------|----------|------------|--------------|---------------------------|--------------------|--------------|----------------|---------|---------|----------|------------|
| 1 | 510,63    | 28,80              | 2,40           | 1,00            | -        | -          | -            | -                         | -                  | -            | -              | Doctor  | -       | 513      | 96,34      |
| 2 | 278,52    | 30,60              | 2,00           | 1,50            | +        | -          | -            | -                         | -                  | -            | +              | Doctor  | -       | 350      | 94,61      |
| 3 | 135,26    | 25,40              | 2,60           | 1,25            | -        | +          | -            | -                         | -                  | -            | -              | -       | USA     | 1190     | 98,46      |
| 4 | 102,00    | 24,20              | 1,80           | 1,00            | +        | -          | -            | -                         | -                  | -            | -              | -       | USA     | 119      | 96,57      |
| 5 | 73,33     | 37,00              | 2,40           | 2,50            | +        | -          | -            | -                         | -                  | -            | -              | Doctor  | -       | 268      | 94,52      |
